# Supplementary material for: Identification of novel candidate disease genes from de novo exonic copy number variants
Source: PubMed Central journal article supplement (PMC5607840; doi:10.1186/s13073-017-0472-7), 2017-09-21

# Additional File 7

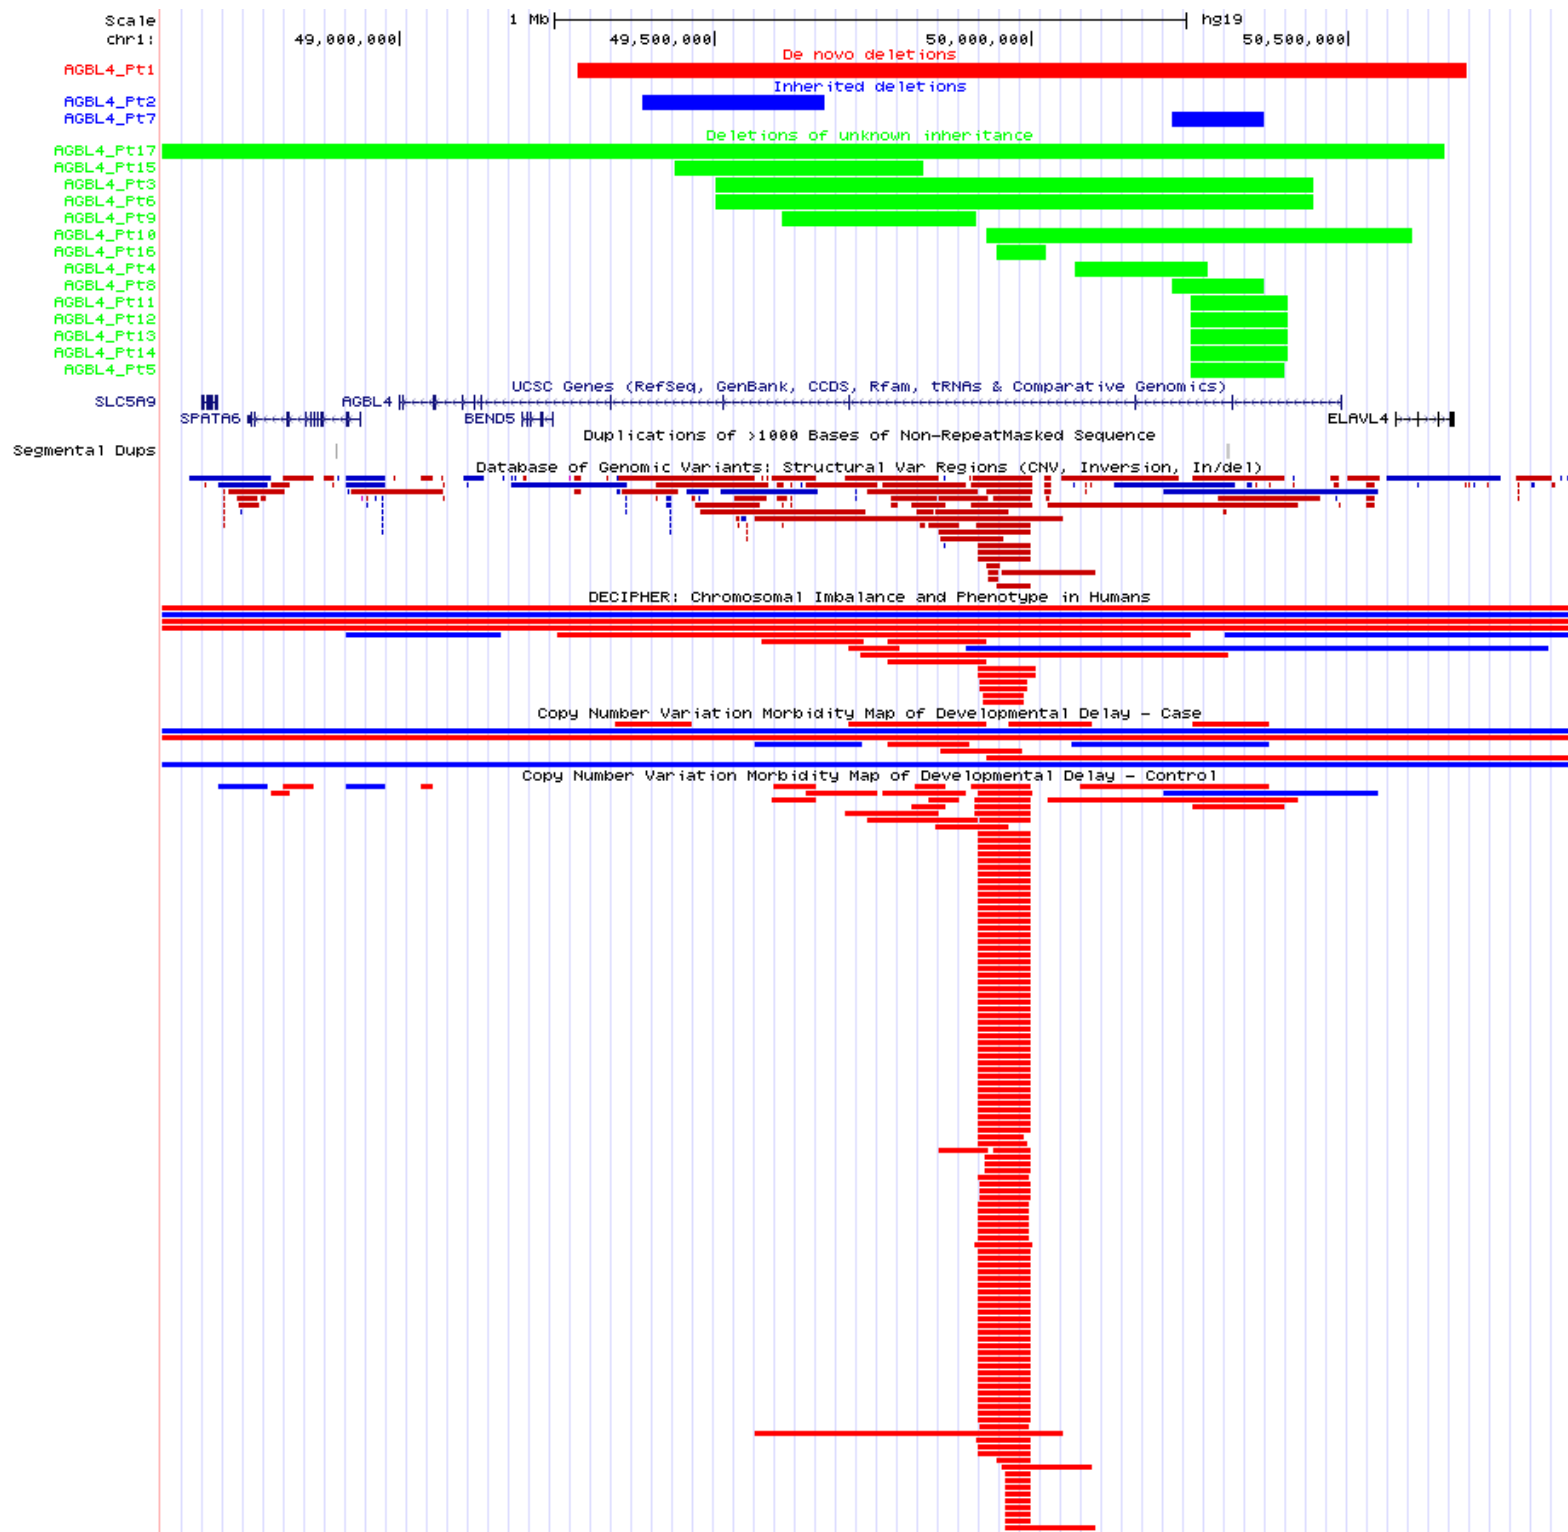

Supplement: 13073_2017_472_MOESM7_ESM.pdf [file 13073_2017_472_MOESM7_ESM.pdf]
